# Supplementary material for: Influence of nutrients and currents on the genomic composition of microbes across an upwelling mosaic
Source: PubMed Central journal article supplement — ISME J. 2012 Jan 26;6(7):1403–14. doi: 10.1038/ismej.2011.201 (PMC3379637; doi:10.1038/ismej.2011.201), 2012-01-26

**Supplementary Information for:**

**Influence of Nutrients and Currents on the Genomic Composition of Microbes across an Upwelling Mosaic**

Lisa Zeigler Allen<sup>1,2</sup>, Eric E. Allen<sup>2,3</sup>, Jonathan H. Badger<sup>1</sup>, John P. McCrow<sup>1</sup>, Ian T. Paulsen<sup>4</sup>, Liam D. H. Elbourne<sup>4</sup>, Mathangi Thiagarajan<sup>5</sup>, Doug B. Rusch<sup>5</sup>, Kenneth H. Nealson<sup>1</sup>, Shannon J. Williamson<sup>1</sup>, J. Craig Venter<sup>1</sup>, Andrew E. Allen<sup>1§</sup>

<sup>1</sup>. Microbial and Environmental Genomics, J. Craig Venter Institute, San Diego, CA, USA

<sup>2</sup>. Scripps Institution of Oceanography, University of California, San Diego, La Jolla, CA, USA

<sup>3</sup>. Division of Biological Sciences, University of California, San Diego, La Jolla, CA, USA

<sup>4</sup>. Macquarie University, Sydney, NSW, Australia

<sup>5</sup>. Informatics, J. Craig Venter Institute, Rockville, MD, USA

**Keywords:** Marine / Metagenomics / Upwelling / California Current

**Running Title:** Microbial Metagenomics across a Southern California Current Upwelling Mosaic

**Subject Category:** Integrated genomics and post-genomics approaches in microbial ecology

§Corresponding author: Andrew Allen, aallen@jcvl.org

## Supplemental Methods:

### Nutrient and oceanographic data

Metadata was collected on CalCOFI cruise 0707 using a variety of oceanographic sampling devices, for details  
5 see SIO Ref. 07-08. Briefly, a Seabird Electronics, Inc., Conductivity-Temperature-Depth (CTD) instrument  
(911) equipped with a 24, 10-liter rosette was used to collect seawater. Seawater temperature measurements were  
taken from the CTD prior to the bottle trip and salinity was analyzed using a Guildline model 8410 Portasal  
salinometer. Nutrient samples for dissolved silicate, phosphate, nitrate and nitrite were obtained using methods  
similar to Gordon *et al.*, 1993. Water samples for assessing chlorophylla and phaeopigments were filtered onto  
10 Whatman GF/F filters and the pigments extracted using methods similar to (Venrick, *et al.* 1984). Pigment  
concentrations were determined from fluorescence readings before and after acidification with a Turner Designs  
Fluorometer Model 10-AU-005-CE.

### Library Construction and Sequencing

Environmental DNA (eDNA) was isolated from the impact filters and library construction was performed  
15 according to Rusch, *et al.* 2007. Briefly, shipboard frozen filters contained in the following storage buffer: 1X  
Tris-EDTA (TE) buffer (Invitrogen), 50mM EGTA and 50mM EDTA, were thawed to room temperature and  
aseptically cut for DNA extraction. Filter fragments were placed in 50ml conical tubes and lysis was performed  
as previously described. DNA was ultimately purified using a phenol/chloroform extraction method followed by  
ethanol precipitation. For library construction using Sanger sequencing, eDNA was randomly sheared using  
20 nebulization and polished through BAL31 nuclease and T4 DNA polymerase reactions. Fragmented DNA was  
size selected via agarose gel electrophoresis. BstX1 adapters were ligated onto the inserts prior to ligation into the  
BstX1 linearized pBR322c2T plasmid vector used for shotgun library preparation. Libraries were then  
transformed and plated for isolation of colonies as sequencing templates.

Di-deoxy sequencing was used to generate paired-end sequence reads from plasmid templates. For 454 GS FLX  
25 Titanium sequencing eDNA was sheared and adaptors ligated. Subsequently, AMPure bead purification was  
followed by emulsion PCR (emPCR) and sequenced on the Roche 454 Sequencing platform. All sites, except  
GS260 had enough eDNA to perform Sanger and 454 sequencing from the 0.1 $\mu$ m eDNA.

### Accession numbers

The 454 metagenomic datasets were submitted to GenBank with the following accession numbers: GS257  
30 MIDpool-BF-01-669\_FRLB9F301.GSMIDSMID11 (0.8um): SRA036240, GS257MIDpool-BF-01-  
669\_FRLB9F301.GSMIDSMID12 (3.0um): SRA036241, GS258-BF-A3B-01-  
685\_GAA1ATG01\_EL1.A3B\_AGACGCACTC (0.1um): SRA036170, GS258MIDpool-4F-01-  
593\_FQRL34J01.GSMIDSMID5 (0.8um): SRA036235, GS258MIDpool-4F-01-593\_FQRL34J01.GSMIDSMID6

(3.0um): SRA036236, GS259-BF-A4B-01-755\_GAKKUUN01\_EL1.A4B\_AGCCTGTAG (0.1um):  
35 SRA036171, GS259Pool-4F-01-675\_FVQZ7HG01.GSMIDSMID1 (0.8um): SRA036246, GS259Pool-4F-01-  
675\_FVQZ7HG01.GSMIDSMID2 (3.0um): SRA036247, GS260MID70P8-BF-01-  
580\_FVQ8UJY01.GSMIDSMID7 (0.8um): SRA036244, GS260MID83P0UM-BF-01-  
571\_FVQ8UJY02.GSMIDSMID8 (3.0um): SRA036245, GS262-BF-A5B-01-  
733\_GAKKUUN01\_EL1.A5B\_ATCAGACACG (0.1um): SRA036173, GS262MIDPool-BF-02-  
40 616\_FR1ZSJO01.GSMIDSMID3 (0.8um): SRA036238, GS262MIDPool-BF-02-  
616\_FR1ZSJO01.GSMIDSMID4 (3.0um): SRA036239, GS263-BF-A6B-01-  
757\_GAKKUUN02\_EL1.A6B\_ATATCGCGAG (0.1um): SRA036237, GS263MIDPool-BF-01-  
630\_FSP4E4R02.GSMIDSMID5 (0.8um): SRA036242, GS263MIDPool-BF-01-  
630\_FSP4E4R02.GSMIDSMID6 (3.0um): SRA036243, GS264-BF-A7B-01-  
45 765\_GAKKUUN02\_EL1.A7B\_CGTGTCTCTA (0.1um): SRA036174, GS264MIDpool-BF-02-  
689\_FVQZ7HG02.GSMIDSMID7 (0.8um): SRA036248, GS264MIDpool-BF-02-  
689\_FVQZ7HG02.GSMIDSMID8 (3.0um): SRA036249.

### Removal of 454-sequencing artifacts and protein prediction

To remove artificial replicates in 454-Titanium generated sequences the approach reported by Gomez-Alvarez, *et*  
50 *al.*, 2009 was used with the following parameters: sequences sharing >90% nucleotide identity beginning with  
the same 3 nucleotides were removed.

During our analysis of 454 data it became apparent that many genes were being truncated, mis-annotated,  
annotated multiple times (as two separate ORF's) or completely missed due to a high rate of frameshift error  
associated with 454 XLR sequencers. To improve the counts and accuracy of our annotation we implemented a  
55 pipeline to correct suspected frameshift related errors on individual sequencing reads. The pipeline can be  
summarized by the following steps:

- 1) Identify all stop to stop open reading frames greater than 90 bp where the end of a read/contig was treated  
as a stop
- 60 2) Each stop to stop ORF was converted into a set of overlapping 20 amino acid words with 5 amino acids  
of overlap with the preceding word
- 3) The 20 aa words were rapidly aligned to the nraa database using cd-hit-2d with the following non-default  
parameters: -G 0 -aS 0.9 -c 0.7 -n 5 -g 1
- 4) The nraa peptides identified by cd-hit-2d were used to construct a mini-database of informative peptides  
65 for a more exhaustive frameshift tolerant BLASTX search
- 5) Metagenomic reads/assemblies were searched against the mini-nraa database using NCBI BLASTX  
V2.2.23 with the following non-default parameters: -F "m L" -U T -w 11 -e 1e-5 -b 1 -v 5
- 70 6) The top non-overlapping BLASTX hits with or without frameshifts were used to identify predicted  
peptides with sequence similarity based evidence. If the best BLASTX hit contains a frameshift then a

new peptide will supersede and replace any overlapping original peptides thus correcting genes presumably miscalled due to sequencing error. The DNA sequence is not corrected but a record of the frameshift and its location are associated with the newly predicted peptide. If the predicted peptide does not contain a frameshift the new prediction will be kept if only if there was no original gene call covering that portion of the read thus allowing similarity based methods to identify genes potentially missed by the gene finder due to frameshifts. If an original gene call is superseded by these methods it is eliminated from the set of called genes and replaced by the frameshift corrected peptide.

- 7) Peptides predicted by sequence similarity were then masked from the reads with N's
- 8) To identify unknown potentially frameshifted genes we employed FragGeneScan V1.13 (Rho et al., 2010; 10.1093/nar/gkq747). While much faster than the homology based approach outlined above, FragGeneScan has a tendency to fuse genes that are present in the same operon and can frequently mis-identify the site of the frameshift by +/- 10 amino acids. With such issues in mind, FragGeneScan is the best alternative for identifying frameshifted genes where sequencing similarity was not an option.
- 9) After frameshift correction there exist three distinct non-overlapping sets of predicted peptides: open reading frames without frameshifts, frameshifted peptides corrected sequence similarity, and frameshifted peptides identified by FragGeneScan.

The frameshifting rate varies between datasets and is dependent to a degree on the %GC of the sample and the size of the filter that was sequenced. For a typical microbial metagenomic dataset we have documented a modest increase in the number of genes predicted using frameshifted sequence similarity while identifying a large number of new peptides using FragGeneScan (**Table S1**) along with an increase in the average ORF length as ORF's are merged or extended (data not shown). The larger filters (0.8 and 3.0  $\mu m$ ) contain a greater proportion of uncharacterized organisms including eukaryotic genomes and this significantly decreases the ability to correct genes by sequence similarity.

Calibration of sequence similarity based frameshift correction was performed using paired Sanger and 454 sequenced samples not analyzed in this paper. Using reference genomes that were abundantly represented by high identity reads we were able to measure the rate of frameshifts in either the Sanger or 454 datasets based on their position within a read (**Figure S12**). Based on these frequencies there is only a 9.29% chance of finding a 450 bp 454 read without a frameshift. Indeed many reads have multiple frameshifts. The impact these frameshifts have on a gene calling and functional annotation varies both with the gene and with the mechanism by which they are annotated so that not all gene families are impacted evenly.

Protein prediction of Sanger generated sequences involved three steps to identify the most likely protein sequence: (i) Six-frame translation with a 90bp minimum size cutoff; (ii) MetaGeneAnnotator (Noguchi, *et al.* 2008) to identify ORFs >90bp; (iii) ORFs found in step 'ii', are used to identify ORFs in step 'i' and if the ORF in step 'i' extends beyond that found in step 'ii' then that sequence is used as the longest possible sequence.

## Bacterial genome estimation and phylogenetic placement of marker peptides

A set of core, mostly single-copy bacterial marker proteins, found in 880 fully sequenced reference genomes, were used to estimate bacterial genome equivalents and for normalization of metagenomic samples. AMPHORA (Wu, *et al.* 2008), a set of hidden Markov models (HMMs), was used to detect the following 31 marker genes: *dnaG*, *frr*, *infC*, *nusA*, *pgk*, *pyrG*, *rplA*, *rplB*, *rplC*, *rplD*, *rplE*, *rplF*, *rplK*, *rplL*, *rplM*, *rplN*, *rplP*, *rplS*, *rplT*, *rpmA*, *rpoB*, *rpsB*, *rpsC*, *rpsE*, *rpsI*, *rpsJ*, *rpsK*, *rpsM*, *rpsS*, *smpB*, *tsf*. These data were then used to extrapolate a predicted genomic size. Although Raes *et al.* (2007) do not use the more recently published AMPHORA HMMs, an approach similar to (Raes, *et al.* 2007) was taken to assess the genome equivalents sequenced in each sample. Very similar to Raes *et al.* 2007, we use marker gene density to predict effective genome size and report genome equivalents as the sum of weighted counts for each marker. Whereas Raes *et al.* 2007 use marker gene length to calibrate marker gene counts, independently for each marker gene, we calibrate marker gene counts with coefficients derived from an additive model. The marker coefficients were derived from a linear model built to estimate average genome number from hits to each of the marker HMMs (identified with AMPHORA HMMs) using simulated metagenomic training data generated by METASIM (Richter, *et al.* 2008). Coefficients for each marker were determined using an additive model of all 31 markers on one linear regression; the formula used was  $y = a_1x_1 + a_2x_2 + \dots + a_nx_n$ . As with Raes *et al.* 2007, the coefficients are generally inversely proportional to the length of the marker, as a larger marker would generate more hits. Along these lines, the coefficient is also generally smaller for markers that have 2 copies per genome (**Table S8**), since more hits to these markers does not necessarily mean more genomes. Of note, an additive model (as opposed to an independent model based on independent estimates for genome equivalents for each marker) was selected as it allowed for dependencies of each marker to be captured. A linear model was constructed and evaluated, but deemed less accurate and was not used for the data presented here. Coefficients derived for the additive model do not follow marker length as closely, as in the linear model; some are negative and/or less informative about the number of genomes (lower coefficient) irrespective of length. Genome equivalent data (counts) were then used to predict the average number of peptides per genome (based on the ratio of total bacterial peptides to estimated genome equivalents (**Figure S2c**)) and subsequently genome size. A model to extrapolate genome size from estimates of the number of peptides per genome was chosen that best fit simulated data from bacterial genomes ranging in size from 1-4Mbp, as well as random mixed samples of genomes of the same average range.

An additional distinction of our approach, relative to Raes *et al.* (2007), is that the initial AMPHORA HMM searches were performed only on peptides identified phylogenetically (with APIS) as members of Kingdom Bacteria. Subsequently the density of genome equivalents was estimated as the ratio of total bacterial peptides, also predicted peptides determined phylogenetically to be Kingdom Bacteria, to bacterial genome equivalents. Constraint of genome equivalent density and total bacterial peptide estimates to only bacterial

peptides introduces the obvious disadvantage of not counting true bacterial peptides that are either not phylogenetically affiliated with Bacteria or phylogenetically unclassifiable because they are novel. However, modeling of simulated metagenomic data indicated that restriction of genome counts to bacterial peptides facilitated relatively accurate estimation of bacterial genome equivalents from multi-lineage communities; such as those found on the larger size class filters analyzed in this study. Therefore restriction of these analyses to Kingdom Bacteria peptides allowed for comparative analyses of bacterial genomic properties between communities of bacteria captured on different size class filters. Also, it should be noted that even in the smallest size class (0.1 – 0.8  $\mu$ M) we generally find that around 10-20% of the predicted peptides are phylogenetically affiliated with either Eukarya or viruses. According to our metagenomic data simulations, inclusion of such peptides in bacterial genome equivalent density estimates is significantly more problematic than restriction of analyses to peptides identified as Kingdom Bacteria.

Core bacterial marker peptides from metagenomic data were phylogenetically placed onto a static reference species tree that was produced with PHYML (Guindon, *et al.* 2003) using a concatenated sequence of the 31 marker genes from each reference genome. A maximum likelihood (ML) method of phylogenetic placement was used similar to (von Mering, *et al.* 2007), in which a set of candidate nodes was chosen for each sequence and the ML position selected. Rather than use all possible internal nodes as candidates, a preliminary screening was used to find a subset of internal nodes that fit prebuilt sequence similarity models from each potential subtree. This process uses position weight matrices describing the peptide sequence distributions at every position of each marker at each node in the reference species tree. The distribution of metagenomic peptides in a sample across the reference tree was then visualized as a density map on a circular tree using 2-D kernel density estimation with the kde2d function in the MASS library in R (Venables, *et al.* 2002). Trees were drawn using an in-house Perl script to generate SVG output from the reference tree and taxonomic node abundances for each sample.

### **SAR11 identification and phylogenetic analyses**

16S rRNA gene sequences in all metagenomics datasets were identified using the JCVI metagenomic annotation pipeline and further analyzed using an in-house version of the small subunit RNA Taxonomy Alignment Pipeline (STAP) (Wu, *et al.* 2008) that was modified to search against the Silva Database (Pruesse, *et al.* 2007). STAP automatically generates and curates multiple alignments and builds a phylogenetic tree that is used to for taxonomic assignment of each 16S rRNA query sequence. Sequences that were binned into the SAR11 cluster at the family level were further verified by BLASTN against the GenBank nt database to identify the top 3 hits. If a SAR11-like hit was in the top 3, the query sequence was used in subsequent phylogenetic analyses. This resulted in 162 total SAR11-like sequences across all sites and size classes. Multiple sequence alignments containing reference and query sequences were generated using MUSCLE (Edgar 2004) followed by gap removal using

Gblocks (Castresana 2000). Sequences were full length with a mean of 1417.1bp. Construction of a mid-  
175 point rooted maximum likelihood tree was performed using Phyml (GTR substitution model) containing only the  
reference sequences. Selected references from each subgroup were taken from previous 16S phylogenetic reports  
(Morris, *et al.* 2005; Stingl, *et al.* 2007). These were used as input into pplacer (Matsen, *et al.* 2010), which  
enabled phylogenetic placement onto the reference tree.

### Assembly

180 Metagenomic sequence reads were assembled using the Celera (Sanger) (Rusch, *et al.* 2007) or Newbler (454-  
Titanium) assemblers using an 86% identity cutoff. Four assemblies were used in the analyses: (i) Sanger  
sequence reads from the 0.1-0.8 $\mu$ m size class for all sites, (ii) 454-Titanium sequence reads from all three size  
fractions (0.1-0.1 $\mu$ m, 0.8-3.0 $\mu$ m, and 3.0-200 $\mu$ m), (iii) Sanger sequence reads from GS260 0.1-0.8 $\mu$ m size class,  
and (iv) 454-Titanium sequence reads from GS260 0.8-3.0 $\mu$ m size class. Predicted proteins, from unassembled  
185 metagenomic reads, were mapped to scaffolds or contigs and their phylogenetic classification from APIS used to  
assign scaffold/contig taxonomy. Scaffolds/contigs were considered Planctomycete or SAR11 if  $\geq 33\%$  of the  
predicted ORFs in the scaffold/contig were classified as one of these taxa. To identify the contribution of site-  
specific reads to the aggregate scaffolds/contigs, the abundance of sequence reads from each site and size class  
was calculated for all scaffolds/contigs. This was performed by taking the presence or absence of a read from each  
190 scaffold from each site and computing the Hamming distance between vectors for each site. The distances were  
reduced to 2-dimensions by Multidimensional Scaling (MDS) using the cmdscale function in R, and plotted.

### Statistical analyses

All statistical analyses were performed using the R statistical program (Team 2008)  
(<http://www.gnu.org/software/r/R.html>). Principal Component Analysis (PCA) was conducted on the  
195 oceanographic metadata and amino acid frequency such that each was a variable considered and the first two  
principles were plotted. Multiple dimensional scaling (MDS) was performed using distance matrices of specific  
data.

### Supplementary Figure Legends:

**Figure S1:** Principal component analysis of DNA sequence characteristics from the 0.1 $\mu$ m filter: A) tri-  
200 nucleotide composition and B) amino acid frequency.

**Figure S2:** Genome equivalent and genome size estimation for 454 sequences. A) genome equivalents and B)  
genome size each plotted with sites on the x-axis binned by size fraction: 0.1 $\mu$ m (black), 0.8 $\mu$ m (orange), 3.0 $\mu$ m  
(purple). C) Table of data used and obtained in genome equivalent calculations.

205 **Figure S3:** Taxonomic classification via APIS (Automated Phylogenetic Inference System) of the 454-Titanium generated sequences. The abundance of each taxonomic category was calculated and the difference from the mean for each site was plotted.

**Figure S5:** Viral sequence diversity comparison of three filters. Sequence similarity cutoff, y-axis and the number of clusters per viral peptides, x-axis. Sites binned by size fraction: 0.1 $\mu$ m (black), 0.8 $\mu$ m (orange) and 3.0 $\mu$ m (purple).

210 **Figure S6:** Heatmap of eukaryotic taxonomic composition of sequences from the 0.8-200 $\mu$ m size classes.

**Figure S7:** Satellite chlorophylla data of station 83.80 (GS260). Each map is an 8 day composite A) before sampling, B) during sampling, and C) after sampling.

215 **Figure S8:** MDS plot of CCP sequences compared to reference genomes. E-values from BLASTP against reference Planctomycete genomes were used to generate distance matrix. Abbreviations are as follows: PM = *P. maris*, RB = *R. baltica*, PL = *P. liminophilus*, GO = *G. obscuriglobus*, BM = *B. marina*, CCP = California Current Planctomycete.

220 **Figure S9:** MDS analysis of sample contribution to assembled sequences. All scaffolds A) 0.1 $\mu$ m Sanger sequences and contigs B) 0.1, 0.8 and 3.0 $\mu$ m 454 sequences. *Pelagibacter* sp. binned scaffolds/contigs from C) 0.1 $\mu$ m Sanger sequences and D) 0.1, 0.8 and 3.0 $\mu$ m 454 sequences; black circle indicates large size class libraries (0.8-200 $\mu$ m) with the exception of GS258 0.1 $\mu$ m. Sites were color-coded based on oceanographic metadata: oligotrophic (blue circle), aged-upwelled (green triangle), upwelled (red square).

225 **Figure S10:** Glutamine synthetase II sequences identified as Mimivirus-like. A-G are NJ phylogenetic trees each containing a single environmental (metagenomic) sequence (red) and appropriate reference sequences s. H) Phylogenetic tree derived from pplacer showing all seven environmental (metagenomic) sequences (purple) in the context of reference sequences (\*Mimivirus reference sequence).

230 **Figure S11:** Transporter proteins binned by substrate versus genome size for each site and size class using the 454 generated sequence data. Each data point represents a discrete size class at a particular site. Estimates for transporters per genome are given on the y-axis and estimates for genome size are given on the x-axis. Colors denote size fraction: 0.1 $\mu$ m (black), 0.8 $\mu$ m (orange), 3.0 $\mu$ m (purple). Shapes indicate operationally defined groups based on oceanographic context: oligotrophic (circle), aged-upwelled (triangle), and upwelled (square). A linear model was fit to the data for each substrate where substrate/genome for each site was the response vector and genome size the linear predictor for the response. The relationship between genome-size normalized abundance for transporters for a particular substrate (y-axis) and estimated genome size (x-axis) provides an indication of how particular transporters scale with genome size or are enriched or depleted in bacterial communities with larger or smaller average genome sizes.

235 **Figure S12:** Detection of frameshifts in 454-derived metagenomic sequences. A.) Methodology for identification and correction of frameshifts. B.) Rates of error induced frameshifts and stop codons determined on 454 reads based on comparison to closely related reference genomes.

## 240 **Supplementary References**

Castresana, J. (2000). Selection of conserved blocks from multiple alignments for their use in phylogenetic analysis, *Molecular biology and evolution*, 17(4), 540.



- Edgar, RC. (2004). MUSCLE: multiple sequence alignment with high accuracy and high throughput, *Nucleic Acids Res*, 32(5), 1792.
- 245 Guindon, S and Gascuel, O. (2003). A simple, fast, and accurate algorithm to estimate large phylogenies by maximum likelihood, *Systematic biology*, 52(5), 696.
- Matsen, FA, Kodner, RB, Armbrust, EV. (2010). pplacer: linear time maximum-likelihood and Bayesian phylogenetic placement of sequences onto a fixed reference tree, *BMC bioinformatics*, 11, 538.
- 250 Morris, RM, Vergin, KL, Cho, JC, Rappe, MS, Carlson, CA, Giovannoni, SJ. (2005). Temporal and spatial response of bacterioplankton lineages to annual convective overturn at the Bermuda Atlantic Time-series Study site, *Limnol. Oceanogr.*, 50(5), 1687.
- Noguchi, H, Taniguchi, T, Itoh, T. (2008). MetaGeneAnnotator: Detecting Species-Specific Patterns of Ribosomal Binding Site for Precise Gene Prediction in Anonymous Prokaryotic and Phage Genomes, *DNA Res*, 15(6), 387.
- 255 Pruesse, E, Quast, C, Knittel, K, Fuchs, BM, Ludwig, W, Peplies, J *et al.* (2007). SILVA: a comprehensive online resource for quality checked and aligned ribosomal RNA sequence data compatible with ARB, *Nucleic Acids Res*, 35(21), 7188.
- Raes, J, Korb, JO, Lercher, MJ, von Mering, C, Bork, P. (2007). Prediction of effective genome size in metagenomic samples, *Genome biology*, 8(1), R10.
- 260 Richter, DC, Ott, F, Auch, AF, Schmid, R, Huson, DH. (2008). MetaSim: a sequencing simulator for genomics and metagenomics, *PloS one*, 3(10), e3373.
- Rusch, DB, Halpern, AL, Sutton, G, Heidelberg, KB, Williamson, S, Yooseph, S *et al.* (2007). The Sorcerer II Global Ocean Sampling expedition: northwest Atlantic through eastern tropical Pacific, *PLoS biology*, 5(3), e77.
- 265 Stingl, U, Tripp, HJ, Giovannoni, SJ. (2007). Improvements of high-throughput culturing yielded novel SAR11 strains and other abundant marine bacteria from the Oregon coast and the Bermuda Atlantic Time Series study site, *The ISME journal*, 1(4), 361.
- Team, RDC, (R Foundation for Statistical Computing, Vienna, Austria, 2008).
- Venables, WN and Ripley, BD, *Modern applied statistics with S*, 4th ed. (Springer, 2002).
- Venrick, EL and Hayward, TL. (1984). Determining Chlorophyll on the 1984 CalCOFI surveys., *California Cooperative Oceanic Fisheries Investigations, Data Report XXV*, 74.
- 270 von Mering, C, Hugenholtz, P, Raes, J, Tringe, SG, Doerks, T, Jensen, LJ *et al.* (2007). Quantitative phylogenetic assessment of microbial communities in diverse environments, *Science (New York, N.Y.)*, 315(5815), 1126.
- Wu, D, Hartman, A, Ward, N, Eisen, JA. (2008). An automated phylogenetic tree-based small subunit rRNA taxonomy and alignment pipeline (STAP), *PloS one*, 3(7), e2566.
- 275 Wu, M and Eisen, JA. (2008). A simple, fast, and accurate method of phylogenomic inference, *Genome biology*, 9(10), R151.

**Supplementary Tables:**

| Library | Size Fraction | Sequencing Reads | Original Predicted Proteins | Proteins with Frameshifts | Proteins without Frameshifts | FragGenescan Predictions | Homology based Predictions | Final Proteins Predicted |
|---------|---------------|------------------|-----------------------------|---------------------------|------------------------------|--------------------------|----------------------------|--------------------------|
| GS257   | 0p1           | 271025           | 188910                      | 116441                    | 72469                        | 75580                    | 130973                     | 279022                   |
| GS257   | 0p8           | 378864           | 187948                      | 125422                    | 62526                        | 213027                   | 67183                      | 342736                   |
| GS257   | 3p0           | 272795           | 181001                      | 114673                    | 66328                        | 119562                   | 91345                      | 277235                   |
| GS258   | 0p1           | 272039           | 214490                      | 107541                    | 106949                       | 66412                    | 116840                     | 290201                   |
| GS258   | 0p8           | 346162           | 192413                      | 117482                    | 74931                        | 185489                   | 57302                      | 317722                   |
| GS258   | 3p0           | 270789           | 152102                      | 92180                     | 59922                        | 147145                   | 42865                      | 249932                   |
| GS259   | 0p1           | 320468           | 124202                      | 67176                     | 57026                        | 91672                    | 112469                     | 261167                   |
| GS259   | 0p8           | 240049           | 156121                      | 99106                     | 57015                        | 124740                   | 58131                      | 239886                   |
| GS259   | 3p0           | 307215           | 133926                      | 87130                     | 46796                        | 190399                   | 31447                      | 268642                   |
| GS260   | 0p8           | 488373           | 158719                      | 101807                    | 56912                        | 277256                   | 52470                      | 386638                   |
| GS260   | 3p0           | 516656           | 107552                      | 71883                     | 35669                        | 323430                   | 13975                      | 373074                   |
| GS262   | 0p1           | 184469           | 74716                       | 40750                     | 33966                        | 52746                    | 66640                      | 153352                   |
| GS262   | 0p8           | 310918           | 193672                      | 112059                    | 81613                        | 138544                   | 80492                      | 300649                   |
| GS262   | 3p0           | 301517           | 144367                      | 88372                     | 55995                        | 159241                   | 45148                      | 260384                   |
| GS263   | 0p1           | 253153           | 146189                      | 83493                     | 62696                        | 69556                    | 105630                     | 237882                   |
| GS263   | 0p8           | 267507           | 171412                      | 95140                     | 76272                        | 112863                   | 68624                      | 257759                   |
| GS263   | 3p0           | 269943           | 122883                      | 68758                     | 54125                        | 140596                   | 28570                      | 223291                   |
| GS264   | 0p1           | 313160           | 176135                      | 104155                    | 71980                        | 74754                    | 149254                     | 295988                   |
| GS264   | 0p8           | 206259           | 158733                      | 98571                     | 60162                        | 67524                    | 90621                      | 218307                   |
| GS264   | 3p0           | 247192           | 133890                      | 80314                     | 53576                        | 115392                   | 49243                      | 218211                   |

**Table S1:** Protein prediction statistics using Frameshift correction pipeline. The number of proteins predicted using standard metagenome ORF calling are reported in the ‘original predicted proteins’ column. These predicted proteins are further partitioned, in the next two columns, into the total number of proteins with and without frameshifts. The final predicted protein set (final column) is comprised of proteins without frameshifts in addition to those obtained through the FragGeneScan and homology based frameshift correction pipeline.

| JCVI ID                             | Filter Size (µm) | CalCOFI ID | Sanger         |                |                |               | 454-Titanium     |                  |                  |               |
|-------------------------------------|------------------|------------|----------------|----------------|----------------|---------------|------------------|------------------|------------------|---------------|
|                                     |                  |            | Reads          | Peptides       | APIS Trees     | % Trees       | Reads            | Peptides *       | APIS Trees       | % Trees       |
| GS257                               | 0.1              | 87.40      | 46621          | 74568          | 40290          | 54.00         | 271025           | 279022           | 145948           | 52.31%        |
| GS258                               | 0.1              | 87.80      | 46760          | 73225          | 40628          | 55.50         | 272039           | 290201           | 156852           | 54.05%        |
| GS259                               | 0.1              | 83.110     | 47173          | 77206          | 42374          | 55.40         | 320468           | 261167           | 97215            | 37.22%        |
| GS260                               | 0.1              | 83.80      | 46325          | 52870          | 22758          | 43.00         | —                | —                | —                | —             |
| GS262                               | 0.1              | 80.90      | 45964          | 64383          | 43035          | 57.90         | 184469           | 153352           | 60211            | 39.26%        |
| GS263                               | 0.1              | 77.60      | 46922          | 64383          | 36236          | 56.30         | 253153           | 237882           | 103908           | 43.68%        |
| GS264                               | 0.1              | 77.49      | 41199          | 73829          | 43563          | 59.00         | 313160           | 295988           | 144964           | 48.98%        |
| GS257                               | 0.8              | 87.40      | —              | —              | —              | —             | 378864           | 342736           | 80938            | 23.62%        |
| GS258                               | 0.8              | 87.80      | —              | —              | —              | —             | 346162           | 317722           | 73639            | 23.18%        |
| GS259                               | 0.8              | 83.110     | —              | —              | —              | —             | 240049           | 239886           | 113758           | 47.42%        |
| GS260                               | 0.8              | 83.80      | —              | —              | —              | —             | 488378           | 386638           | 57131            | 14.78%        |
| GS262                               | 0.8              | 80.90      | —              | —              | —              | —             | 310918           | 219036           | 78236            | 35.72%        |
| GS263                               | 0.8              | 77.60      | —              | —              | —              | —             | 267507           | 257759           | 43677            | 16.94%        |
| GS264                               | 0.8              | 77.49      | —              | —              | —              | —             | 206259           | 218307           | 61896            | 28.35%        |
| GS257                               | 3                | 87.40      | —              | —              | —              | —             | 272795           | 277235           | 11953            | 4.31%         |
| GS258                               | 3                | 87.80      | —              | —              | —              | —             | 270789           | 249932           | 68448            | 27.39%        |
| GS259                               | 3                | 83.110     | —              | —              | —              | —             | 307215           | 268642           | 39128            | 14.57%        |
| GS260                               | 3                | 83.80      | —              | —              | —              | —             | 516684           | 373074           | 85751            | 22.98%        |
| GS262                               | 3                | 80.90      | —              | —              | —              | —             | 301517           | 204389           | 41953            | 20.53%        |
| GS263                               | 3                | 77.60      | —              | —              | —              | —             | 269943           | 223291           | 111546           | 49.96%        |
| GS264                               | 3                | 77.49      | —              | —              | —              | —             | 247192           | 218211           | 64945            | 29.76%        |
| <b>Total or Average Percentage:</b> |                  |            | <b>320,964</b> | <b>480,464</b> | <b>268,884</b> | <b>54.40%</b> | <b>4,424,272</b> | <b>5,314,470</b> | <b>1,642,097</b> | <b>31.75%</b> |

\*Frameshift corrected

**Table S2:** Sequencing statistics for each sample.

**A.) Taxa abundances**

| Taxonomy Lineage                                                        | Abundance    |               |          |               |               |          |
|-------------------------------------------------------------------------|--------------|---------------|----------|---------------|---------------|----------|
|                                                                         | 0.1µm        |               |          | 0.8 and 3.0µm |               |          |
|                                                                         | oligotrophic | aged upwelled | upwelled | oligotrophic  | aged upwelled | upwelled |
| Bacteria;Actinobacteria                                                 | 0.032        | 0.045         | 0.033    | 0.008         | 0.008         | 0.009    |
| Bacteria;Bacteroidetes/Chlorobigroup                                    | 0.188        | 0.316         | 0.366    | 0.282         | 0.255         | 0.344    |
| Bacteria;Chlamydiae/Verrucomicrobia group                               | 0.025        | 0.014         | 0.013    | 0.074         | 0.014         | 0.038    |
| Bacteria;Cyanobacteria                                                  | 0.003        | 0             | 0.002    | 0.016         | 0.026         | 0.026    |
| Bacteria;Cyanobacteria;Chroococcales; Synechococcus                     | 0.001        | 0.002         | 0.002    | 0.055         | 0.016         | 0.028    |
| Bacteria;Cyanobacteria;Prochlorales; Prochlorococcaceae;Prochlorococcus | 0.011        | 0.001         | 0.001    | 0.139         | 0.003         | 0.004    |
| Bacteria;Firmicutes                                                     | 0.021        | 0.011         | 0.014    | 0.015         | 0.022         | 0.018    |
| Bacteria;Planctomycetes                                                 | 0.004        | 0.023         | 0.005    | 0.006         | 0.264         | 0.004    |
| Bacteria;Proteobacteria                                                 | 0.003        | 0             | 0.001    | 0.001         | 0.001         | 0.001    |
| Bacteria;Proteobacteria;Alphaproteobacteria                             | 0.098        | 0.075         | 0.092    | 0.04          | 0.06          | 0.083    |
| Bacteria;Proteobacteria;Alphaproteobacteria; Rhodobacterales            | 0.088        | 0.143         | 0.116    | 0.072         | 0.09          | 0.147    |
| Bacteria;Proteobacteria;Alphaproteobacteria; Rickettsiales;SAR11cluster | 0.232        | 0.035         | 0.062    | 0.043         | 0.034         | 0.02     |
| Bacteria;Proteobacteria;Betaproteobacteria                              | 0.025        | 0.025         | 0.027    | 0.011         | 0.012         | 0.012    |
| Bacteria;Proteobacteria;Deltaproteobacteria                             | 0.012        | 0.004         | 0.009    | 0.01          | 0.009         | 0.013    |
| Bacteria;Proteobacteria;Epsilonproteobacteria                           | 0.009        | 0.005         | 0.006    | 0.004         | 0.005         | 0.005    |
| Bacteria;Proteobacteria;Gammaproteobacteria                             | 0.199        | 0.273         | 0.223    | 0.184         | 0.145         | 0.213    |
| Bacteria;Spirochaetes                                                   | 0.007        | 0.003         | 0.004    | 0.007         | 0.005         | 0.007    |
| Bacteria;Thermotogae                                                    | 0.003        | 0.001         | 0.001    | 0.003         | 0.002         | 0.001    |
| Other                                                                   | 0.025        | 0.009         | 0.013    | 0.019         | 0.02          | 0.018    |
| Unknown Bacteria                                                        | 0.013        | 0.012         | 0.01     | 0.013         | 0.008         | 0.011    |

**B.) Statistical significance of abundance shifts across size class and environments**

| Taxonomy Lineage                                                         | Statistical significance of abundance change across category |      |                                |      |                     |      |                     |      |                     |      |
|--------------------------------------------------------------------------|--------------------------------------------------------------|------|--------------------------------|------|---------------------|------|---------------------|------|---------------------|------|
|                                                                          | Size Class                                                   |      | Environment (all size classes) |      | Environment (0.1µm) |      | Environment (0.8µm) |      | Environment (3.0µm) |      |
|                                                                          | pvalue                                                       | sig. | pvalue                         | sig. | pvalue              | sig. | pvalue              | sig. | pvalue              | sig. |
| Bacteria;Actinobacteria                                                  | 2.02E-115                                                    | 1    | 1.82E-86                       | 1    | 1.96E-15            | 1    | 0.00E+00            | 1    | 0.04                | 0    |
| Bacteria;Bacteroidetes/Chlorobigroup                                     | 2.85E-253                                                    | 1    | 1.12E-03                       | 1    | 5.26E-120           | 0    | 8.52E-21            | 1    | 0.01                | 0    |
| Bacteria;Chlamydiae/Verrucomicrobia group                                | 5.67E-26                                                     | 1    | 1.59E-68                       | 1    | 1.35E-02            | 1    | 1.70E-05            | 1    | 0.27                | 1    |
| Bacteria;Cyanobacteria                                                   | 1.86E-22                                                     | 1    | 3.40E-02                       | 0    | 9.90E-07            | 0    | 5.01E-127           | *1   | 0.03                | 0    |
| Bacteria;Cyanobacteria;Chroococcales; Synechococcus                      | 4.07E-81                                                     | 1    | 3.58E-03                       | 0    | 5.44E-02            | 1    | 7.13E-01            | 1    | 0.08                | 0    |
| Bacteria;Cyanobacteria;Prochlorales; Prochlorococcaceae;Prochlorococcus  | 5.44E-68                                                     | 1    | 3.01E-23                       | 1    | 8.44E-72            | 1    | 7.10E-144           | 1    | 0.00                | 1    |
| Bacteria;Firmicutes                                                      | 2.24E-18                                                     | 1    | 1.98E-01                       | 0    | 9.92E-02            | 0    | 2.32E-09            | 1    | 0.66                | 1    |
| Bacteria;Planctomycetes                                                  | 1.93E-46                                                     | 1    | 9.08E-15                       | 1    | 1.51E-03            | 0    | 7.46E-11            | 1    | 0.66                | 1    |
| Bacteria;Proteobacteria                                                  | 6.26E-05                                                     | 1    | 4.88E-01                       | 0    | 4.28E-02            | 0    | 5.88E-05            | 0    | 0.92                | 0    |
| Bacteria;Proteobacteria;Alphaproteobacteria                              | 8.19E-183                                                    | 1    | 3.70E-135                      | 1    | 5.65E-06            | 1    | 3.03E-31            | 1    | 0.00                | 1    |
| Bacteria;Proteobacteria;Alphaproteobacteria; Rhodobacterales             | 5.62E-105                                                    | 1    | 3.44E-01                       | 0    | 2.01E-02            | 1    | 2.38E-06            | 1    | 0.00                | 0    |
| Bacteria;Proteobacteria;Alphaproteobacteria; Rickettsiales;SAR11 cluster | 0.00E+00                                                     | 1    | 5.31E-284                      | 1    | 4.94E-01            | 1    | 3.66E-19            | 1    | 0.00                | 0    |
| Bacteria;Proteobacteria;Betaproteobacteria                               | 1.88E-71                                                     | 1    | 1.19E-03                       | 1    | 2.44E-06            | 1    | 2.66E-59            | *1   | 0.10                | 0    |
| Bacteria;Proteobacteria;Deltaproteobacteria                              | 9.45E-10                                                     | 1    | 2.03E-01                       | 0    | 5.87E-02            | 0    | 7.04E-03            | 0    | 0.52                | 0    |
| Bacteria;Proteobacteria;Epsilonproteobacteria                            | 2.84E-15                                                     | 1    | 8.94E-02                       | 0    | 1.10E-01            | 0    | 4.26E-02            | *1   | 0.36                | 0    |
| Bacteria;Proteobacteria;Gammaproteobacteria                              | 7.05E-249                                                    | 1    | 3.27E-11                       | 1    | 3.24E-12            | 1    | 7.43E-122           | 1    | 0.00                | 0    |
| Bacteria;Spirochaetes                                                    | 3.22E-04                                                     | 1    | 1.38E-01                       | 0    | 4.19E-07            | 0    | 9.49E-07            | 0    | 0.00                | 0    |
| Bacteria;Thermotogae                                                     | 1.34E-03                                                     | 1    | 6.31E-04                       | 1    | 3.93E-07            | 1    | 1.29E-99            | 1    | 0.00                | 1    |
| Other                                                                    | 2.52E-19                                                     | 1    | 1.61E-19                       | 1    | 1.13E-03            | 1    | 1.75E-13            | 1    | 0.44                | 1    |
| Unknown Bacteria                                                         | 1.75E-11                                                     | 1    | 3.62E-01                       | 0    | 3.28E-01            | 0    | 2.08E-06            | 1    | 0.59                | 0    |

**Table S3:** Sequence abundance of ecologically relevant organisms taxonomically classified using bacterial core HMMs followed by mapping to a reference tree. A.) Taxa abundances were calculated by total peptides mapped to nodes (taxa) indicated divided by the total number of sequences for each habitat (column header). B.) Statistical significance of changes between size class (0.1 and >0.8 $\mu$ m) and environment (oligotrophic, aged-upwelled, upwelled) were calculated using chi-square goodness of fit analyses. Observed values equal the raw counts for each taxa for each category evaluated (habitat or size class) and expected values equal the number of proteins per category evaluated in a given taxa normalized by the contribution of that category to the total (e.g, the number one would expect for each taxa according only to level of sampling differences between size classes and habitats). The p-value was obtained using the right-tailed probability of the chi-squared distribution. The significance of the p-value is given as a 1 (significant) or 0 (not significant) using a Bonferonni correction. Colors indicate whether the taxa abundance for significant values are greater in which size class (0.1 (black) or >0.8 $\mu$ m (purple)) or environment (oligotrophic (blue), aged-upwelled (green), upwelled (red). \*indicate where abundances were equal in the aged-upwelled and upwelled. Non-significant values are grey.

| <b>Taxonomy</b> | <b>0.1µm</b> | <b>0.8µm</b> | <b>3.0µm</b> |
|-----------------|--------------|--------------|--------------|
| Archaea         | 0.00707      | 0.007292     | 0.007055     |
| Bacteria        | 0.902038     | 0.750075     | 0.766224     |
| Eukaryota       | 0.030145     | 0.145655     | 0.134822     |
| Mixed           | 0.041351     | 0.043445     | 0.043695     |
| Unassigned      | 0.877049     | 1.779519     | 1.950267     |
| Viruses         | 0.019396     | 0.053533     | 0.048205     |

**Table S5:** Phylogenetic profiling of ORFs using APIS. Kingdom level taxonomic abundances are shown, indicating a rise in viral sequences in the larger size classes (0.8 and 3.0µm derived sequences).

| <b>Taxonomy</b>  | <b>% Taxa</b> |
|------------------|---------------|
| Unassigned       | 62.50%        |
| Other Bacteria*  | 1.39%         |
| Proteobacteria   | 9.72%         |
| Mixed            | 6.67%         |
| Bacteroidetes    | 6.39%         |
| Verrucomicrobia  | 4.72%         |
| Lentisphaerae    | 2.22%         |
| Cyanobacteria    | 1.67%         |
| Firmicutes       | 1.67%         |
| Acidobacteria    | 0.83%         |
| Gemmatimonadetes | 0.56%         |
| Chlorobi         | 0.28%         |
| Actinobacteria   | 0.28%         |
| Ascomycota       | 0.28%         |
| Bacillariophyta  | 0.28%         |
| Euryarchaeota    | 0.28%         |

**Table S6:** Planctomycete pangenome taxonomic assignment of predicted ORFs. Percent is given as the amount of taxonomic group per total proteins designated as belonging to pangenome.



| Site  | Size Class | # of sar11 | % of total sar11 | Within Subgroups |    |    |     | Outgroups |    |   |   |     |     |
|-------|------------|------------|------------------|------------------|----|----|-----|-----------|----|---|---|-----|-----|
|       |            |            |                  | 1a               | 1b | 2  | 3/4 | 1a        | 1b | 1 | 2 | 1/2 | 3/4 |
| GS257 | 0p1        | 49         | 28.00            | 18               | 5  | 10 | 4   | 8         | -  | - | 1 | 1   | 2   |
| GS258 | 0p1        | 12         | 6.86             | 3                | -  | 4  | 2   | -         | 1  | - | 1 | -   | 1   |
| GS259 | 0p1        | 56         | 32.00            | 10               | 12 | 6  | -   | 8         | 1  | 2 | 9 | 2   | 6   |
| GS262 | 0p1        | 28         | 16.00            | 4                | 2  | 7  | 4   | 3         | 3  | 1 | 3 | -   | 1   |
| GS263 | 0p1        | 8          | 4.57             | 2                | -  | 5  | 1   | -         | -  | - | - | -   | -   |
| GS264 | 0p1        | 15         | 8.57             | 3                | -  | 7  | 2   | 1         | -  | - | - | -   | 2   |
| GS257 | 0p8        | 1          | 0.57             | -                | -  | 1  | -   | -         | -  | - | - | -   | -   |
| GS259 | 0p8        | 1          | 0.57             | -                | -  | 1  | -   | -         | -  | - | - | -   | -   |
| GS257 | 3p0        | 2          | 1.14             | 1                | -  | 1  | -   | -         | -  | - | - | -   | -   |
| GS259 | 3p0        | 1          | 0.57             | 1                | -  | -  | -   | -         | -  | - | - | -   | -   |
| GS263 | 3p0        | 1          | 0.57             | 1                | -  | -  | -   | -         | -  | - | - | -   | -   |
| GS264 | 3p0        | 1          | 0.57             | 1                | -  | -  | -   | -         | -  | - | - | -   | -   |

**Table S7:** SAR11 subgroup identification from fragment 16S rRNA gene sequences found in 454-Titanium generated reads. SAR11 sequences were identified via a JCVI version of STAP, further confirmed by BLASTP against nr. Classification into subgroups was from analysis of placement on reference tree, a (-) indicates no representatives for that specific group were identified. Outgroups denote sequences that were not clading with a reference.

| <b>Marker</b> | <b>Length<br/>(aa)</b> | <b>Linear<br/>Coefficient</b> |
|---------------|------------------------|-------------------------------|
| dnaG          | 613.1                  | 0.016009                      |
| frr           | 184.7                  | 0.057761                      |
| infC          | 174.4                  | 0.090331                      |
| nusA          | 454.1                  | 0.021356                      |
| pgk           | 401                    | 0.041711                      |
| pyrG          | 546.4                  | 0.011538                      |
| rplA          | 232.4                  | 0.086567                      |
| rplB          | 276.6                  | -0.030775                     |
| rplC          | 217.1                  | 0.063662                      |
| rplD          | 208.4                  | -0.00067                      |
| rplE          | 181.3                  | 0.051631                      |
| rplF          | 178.7                  | 0.067095                      |
| rplK          | 143                    | 0.045354                      |
| rplL          | 124.8                  | 0.032811                      |
| rplM          | 147.7                  | 0.00696                       |
| rplN          | 122.6                  | -0.01531                      |
| rplP          | 139.7                  | -0.061306                     |
| rplS          | 123.2                  | -0.003455                     |
| rplT          | 120.3                  | -0.046662                     |
| rpmA          | 88.5                   | -0.026573                     |
| rpoB          | 1308.4                 | 0.072564                      |
| rpsB          | 262.3                  | 0.045404                      |
| rpsC          | 237                    | 0.009766                      |
| rpsE          | 177.5                  | 0.05338                       |
| rpsI          | 137.1                  | -0.013871                     |
| rpsJ          | 103.9                  | -0.010422                     |
| rpsK          | 130                    | -0.035316                     |
| rpsM          | 121.9                  | -0.013983                     |
| rpsS          | 92.4                   | 0.016069                      |
| smpB          | 157.3                  | 0.027191                      |
| tsf           | 286.5                  | 0.061926                      |

**Table S8:** Markers used in genome equivalent and size estimations. Marker length and coefficients for the additive model are given. Coefficients were determined from a simulated metagenomic dataset using reference genomes.

Figure S1

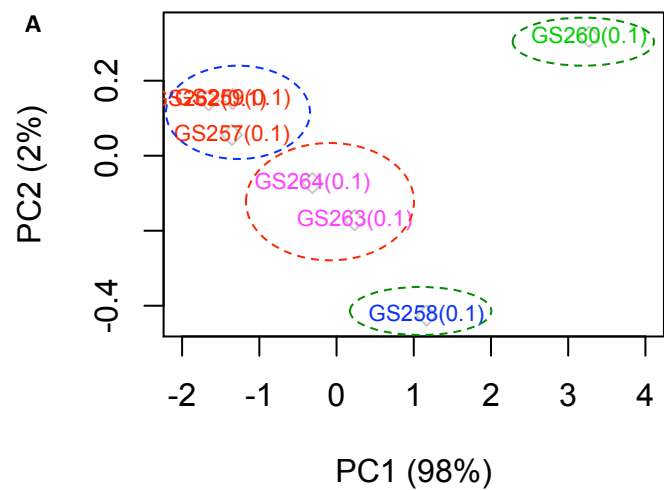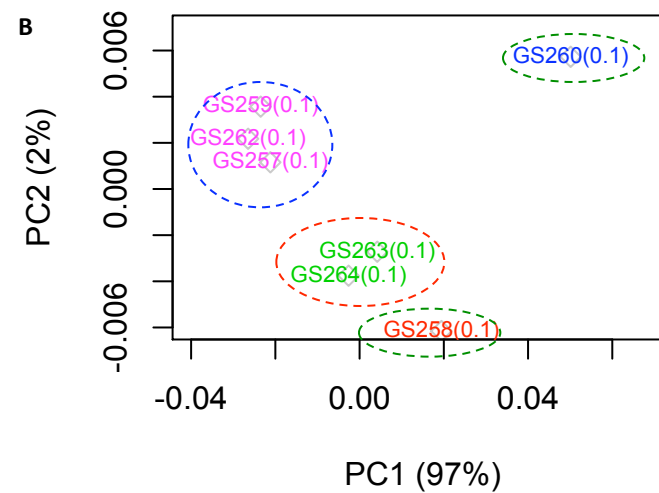

Figure S2

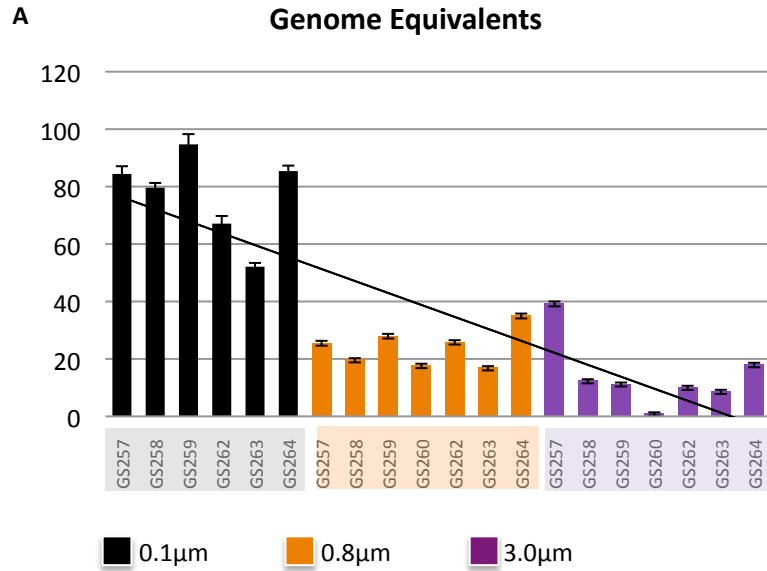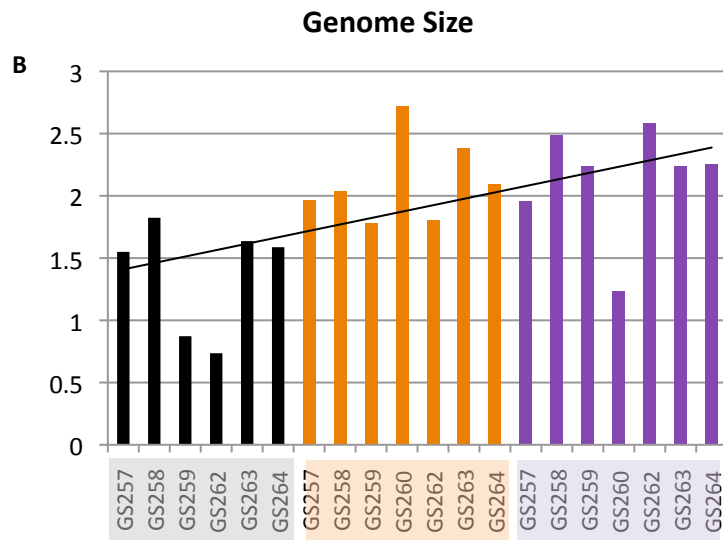

**C**

| 454-Titanium |          |             |      |        |           |                 |        |
|--------------|----------|-------------|------|--------|-----------|-----------------|--------|
|              | Size     | Genome      |      |        | bacterial | bacterial       | Genome |
| Library      | Fraction | Equivalents | SD   | StdErr | peps      | peps/<br>genome | Size   |
| GS257        | Op1      | 84.4        | 28.3 | 2.70   | 128796    | 1526.02         | 1.55   |
| GS258        | Op1      | 79.6        | 17.6 | 1.68   | 140769    | 1768.45         | 1.82   |
| GS259        | Op1      | 94.7        | 37.5 | 3.57   | 87734     | 926.44          | 0.87   |
| GS262        | Op1      | 67.1        | 28.1 | 2.68   | 54049     | 805.50          | 0.74   |
| GS263        | Op1      | 52.1        | 13.8 | 1.31   | 83489     | 1602.48         | 1.64   |
| GS264        | Op1      | 85.4        | 20.1 | 1.91   | 133150    | 1559.13         | 1.59   |
| GS257        | Op8      | 25.6        | 7.4  | 0.70   | 48503     | 1894.65         | 1.97   |
| GS258        | Op8      | 19.8        | 4.8  | 0.46   | 38685     | 1953.79         | 2.03   |
| GS259        | Op8      | 28.1        | 6.6  | 0.63   | 48544     | 1727.54         | 1.78   |
| GS260        | Op8      | 17.8        | 5.6  | 0.53   | 45566     | 2559.89         | 2.72   |
| GS262        | Op8      | 26          | 5.5  | 0.52   | 45434     | 1747.46         | 1.80   |
| GS263        | Op8      | 17          | 5.1  | 0.49   | 38514     | 2265.53         | 2.39   |
| GS264        | Op8      | 35.1        | 7.3  | 0.70   | 70471     | 2007.72         | 2.09   |
| GS257        | 3p0      | 39.3        | 7.4  | 0.70   | 74127     | 1886.18         | 1.96   |
| GS258        | 3p0      | 12.5        | 4.5  | 0.43   | 29405     | 2352.40         | 2.48   |
| GS259        | 3p0      | 11.4        | 4    | 0.38   | 24363     | 2137.11         | 2.24   |
| GS260        | 3p0      | 1.3         | 1.1  | 0.10   | 1617      | 1243.85         | 1.23   |
| GS262        | 3p0      | 10.2        | 4.8  | 0.46   | 24908     | 2441.96         | 2.58   |
| GS263        | 3p0      | 8.8         | 4.8  | 0.46   | 18806     | 2137.05         | 2.24   |
| GS264        | 3p0      | 18.1        | 5.8  | 0.55   | 38936     | 2151.16         | 2.26   |

  

| Sanger  |          |             |     |        |           |                 |        |
|---------|----------|-------------|-----|--------|-----------|-----------------|--------|
|         | Size     | Genome      |     |        | bacterial | bacterial       | Genome |
| Library | Fraction | Equivalents | SD  | StdErr | peps      | peps/<br>genome | Size   |
| GS257   | Op1      | 23.5        | 9.6 | 3.63   | 37170     | 1581.70         | 1.61   |
| GS258   | Op1      | 15.2        | 5.8 | 2.19   | 37561     | 2471.12         | 2.62   |
| GS259   | Op1      | 28.4        | 6.3 | 2.38   | 40080     | 1411.27         | 1.42   |
| GS260   | Op1      | 9.4         | 4.2 | 1.59   | 23006     | 2447.45         | 2.59   |
| GS262   | Op1      | 27.5        | 8.4 | 3.17   | 40413     | 1469.56         | 1.49   |
| GS263   | Op1      | 16.3        | 5.9 | 2.23   | 32938     | 2020.74         | 2.11   |
| GS264   | Op1      | 18.5        | 6.8 | 2.57   | 40433     | 2185.57         | 2.30   |



Figure S4

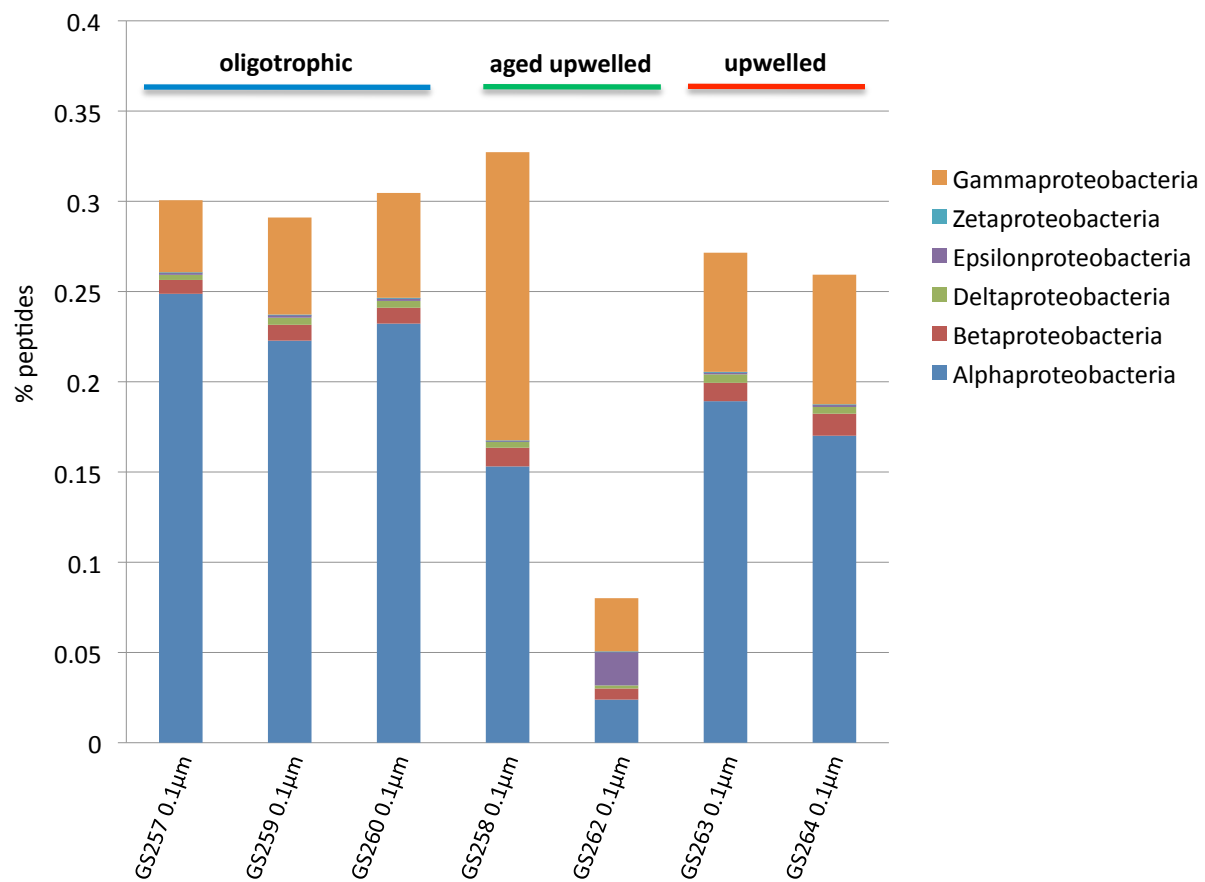

Figure S5

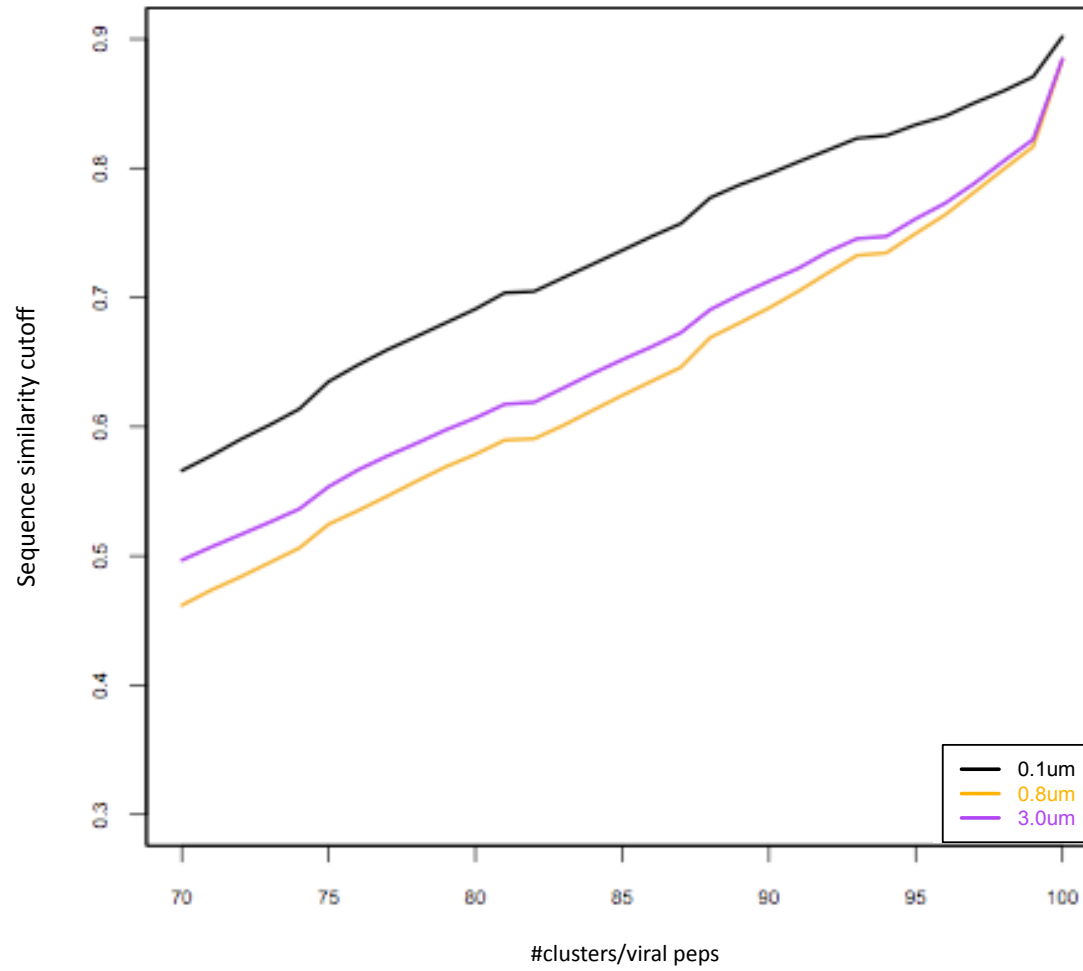

Figure S6

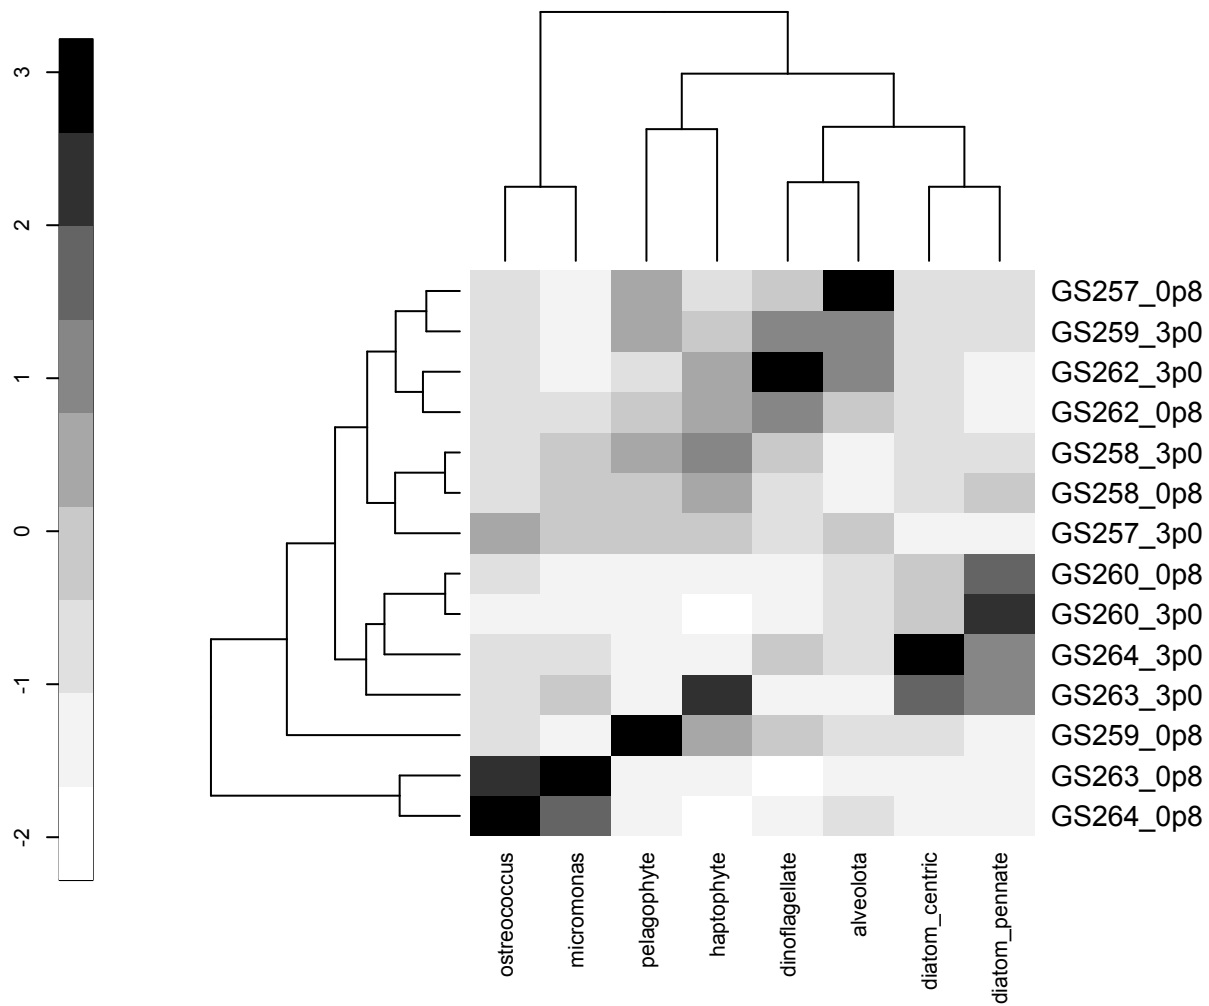



Figure S7

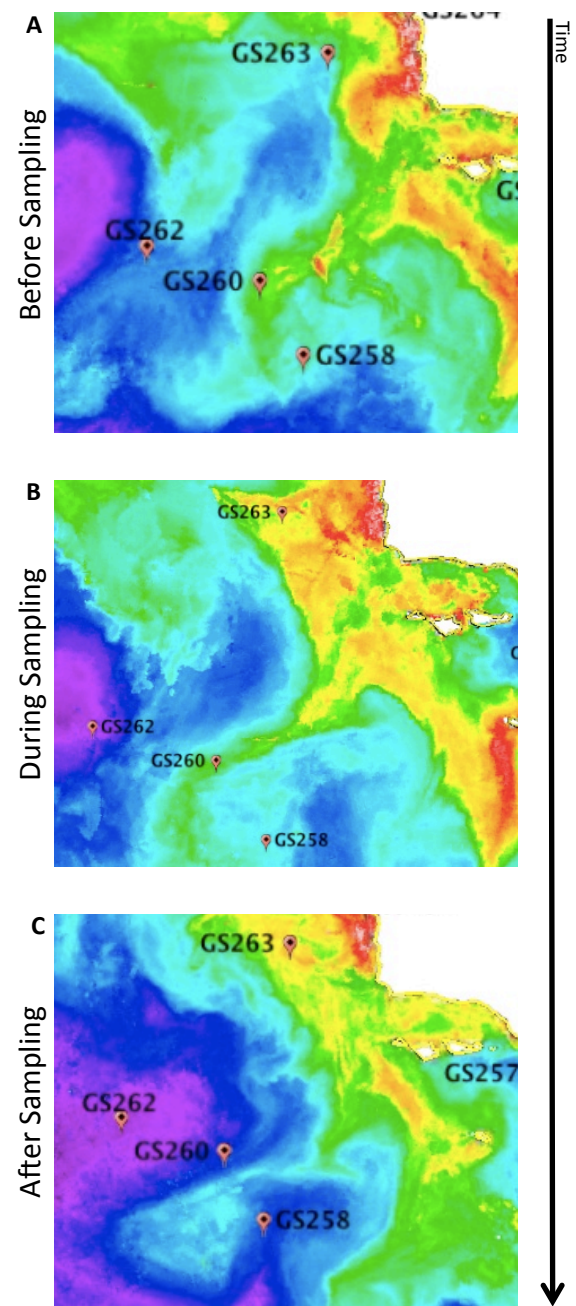

Figure S8

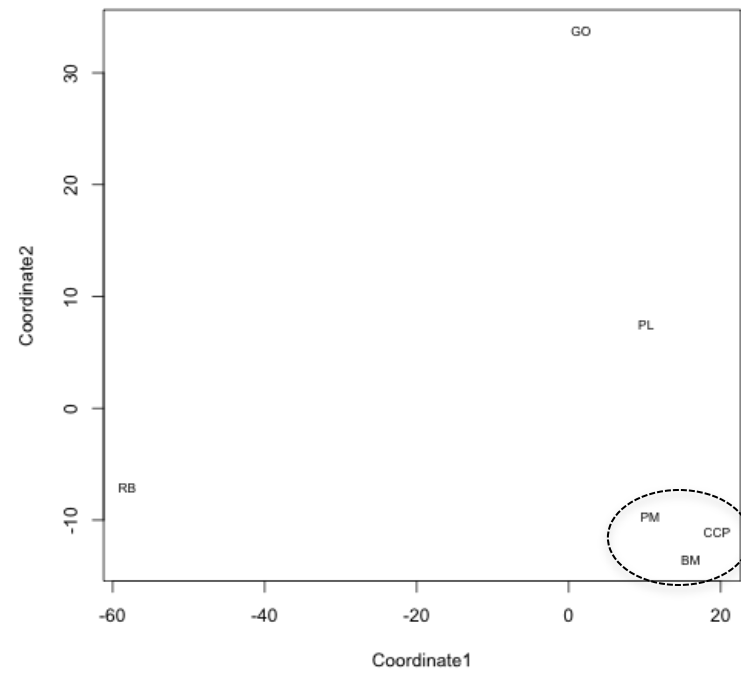

Figure S9

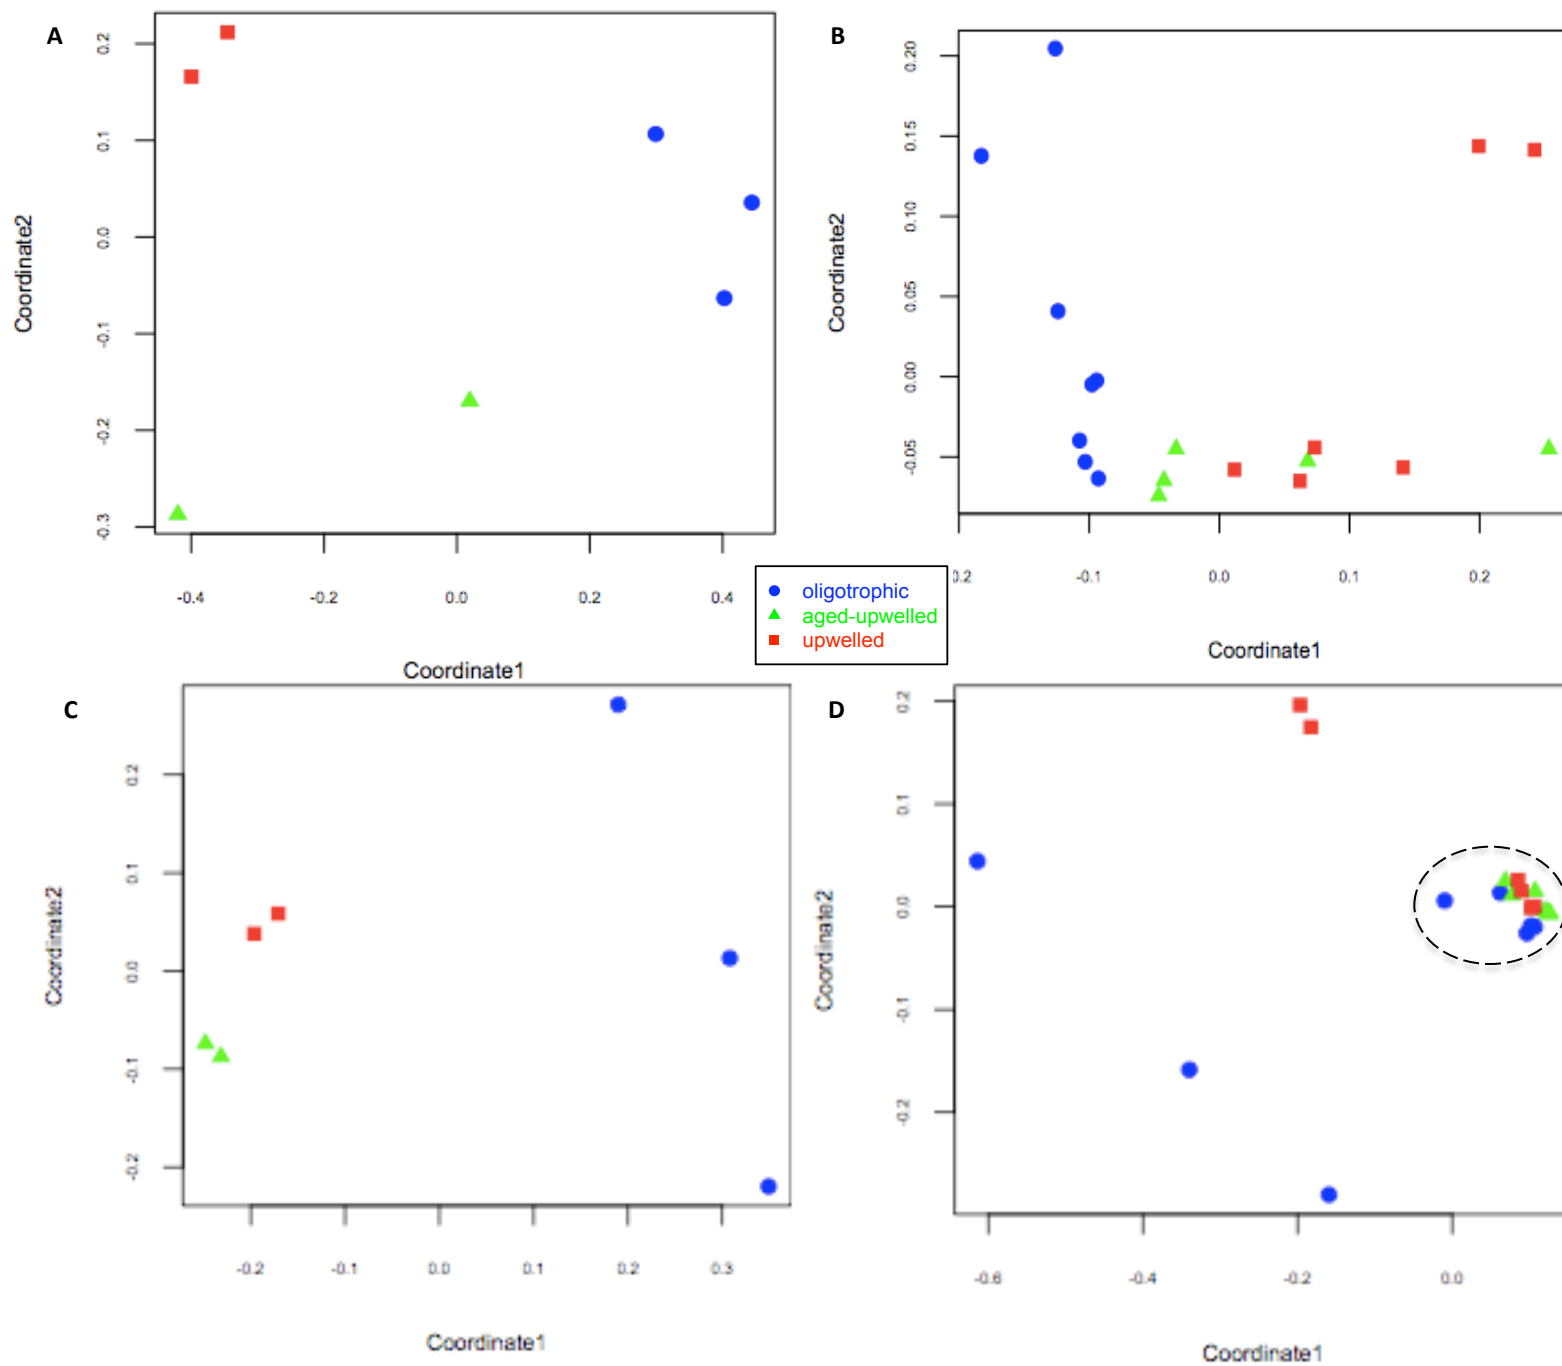

Figure S10

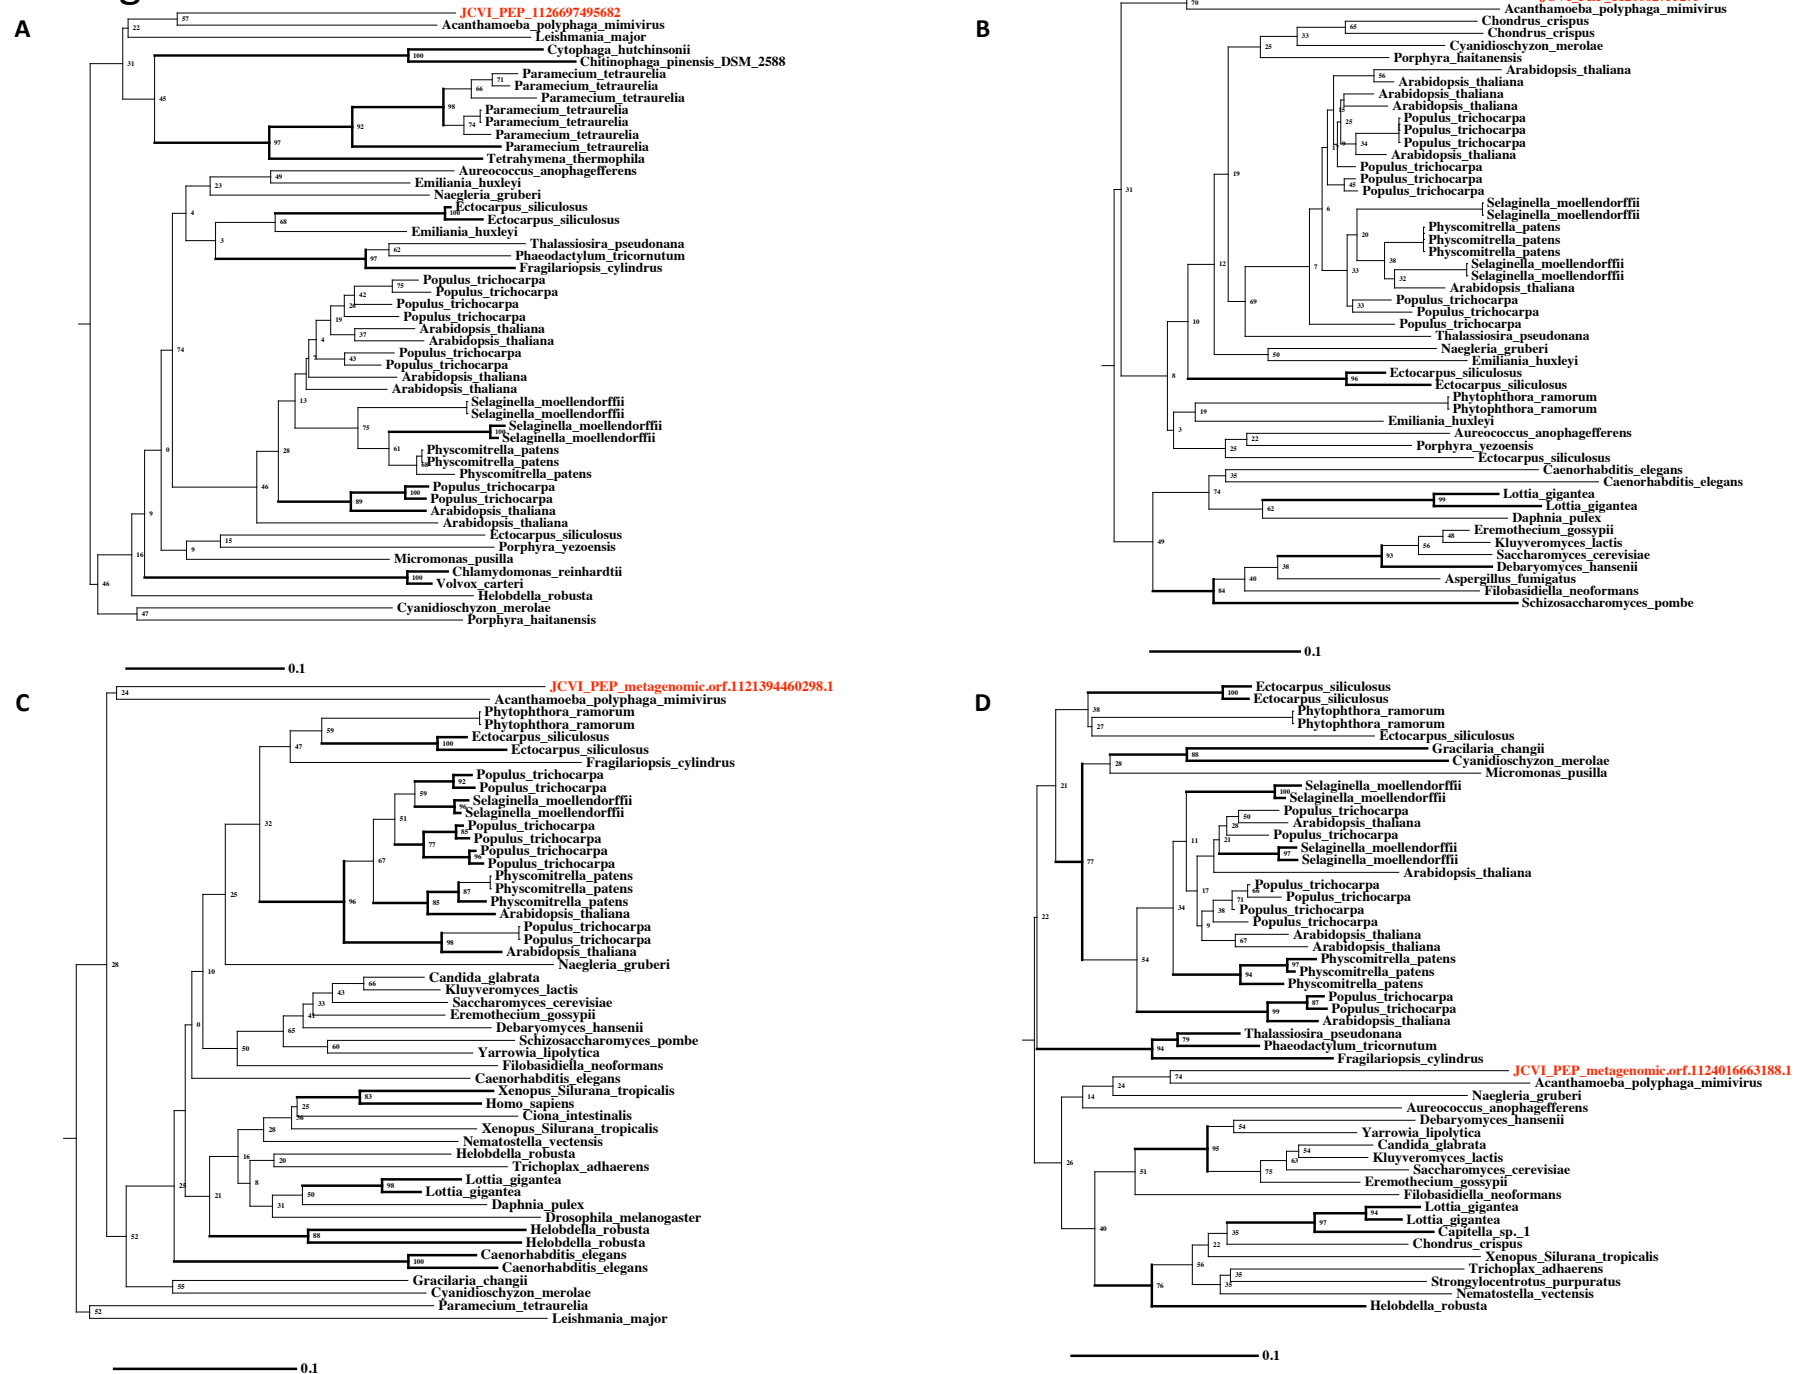

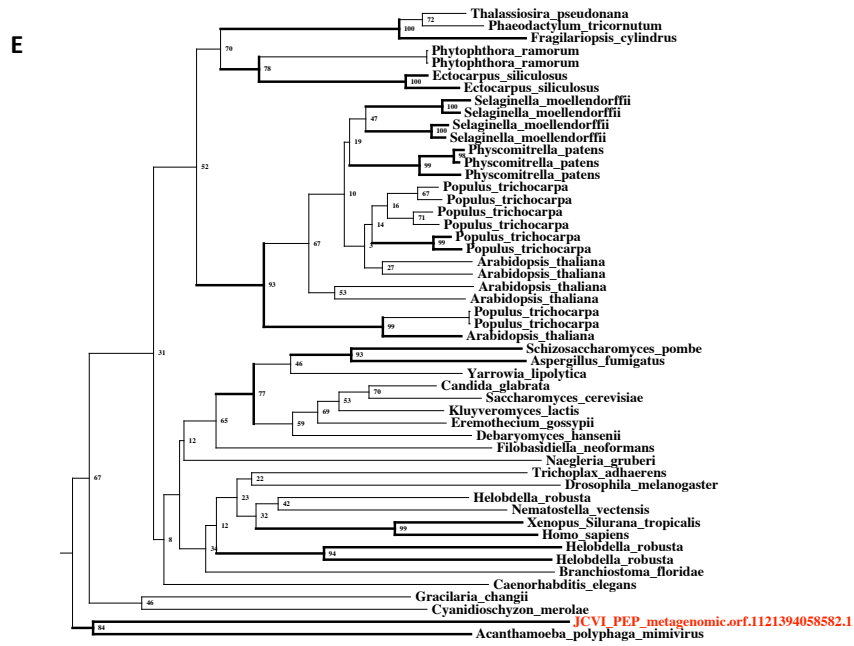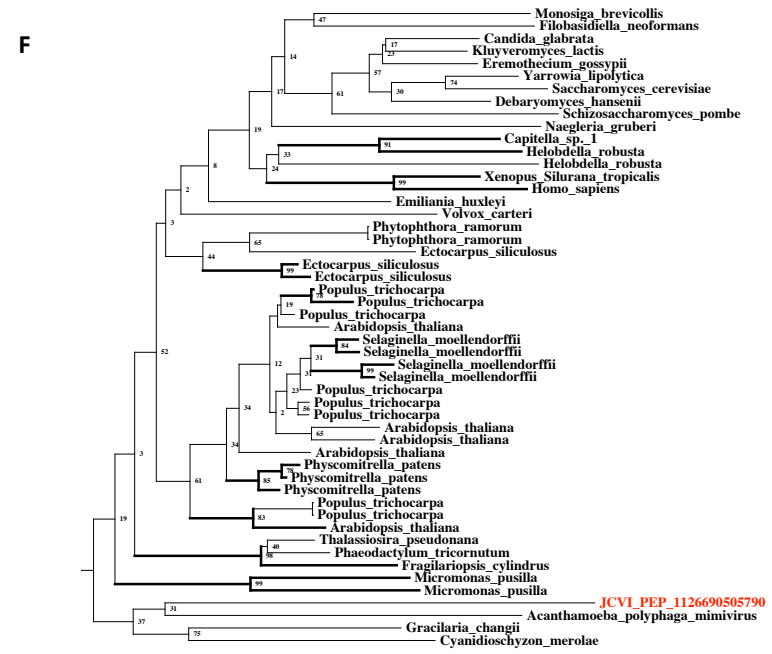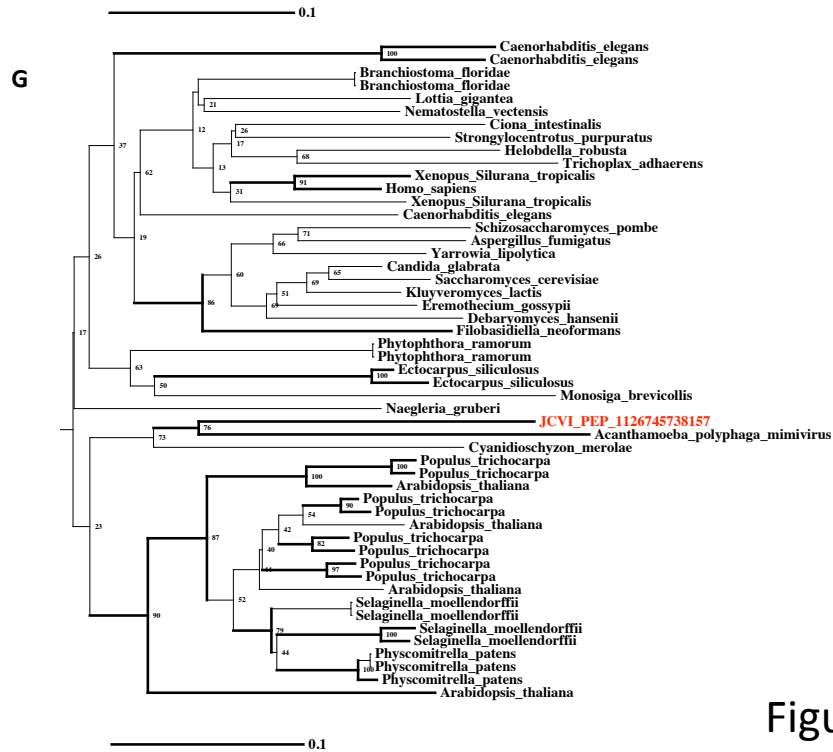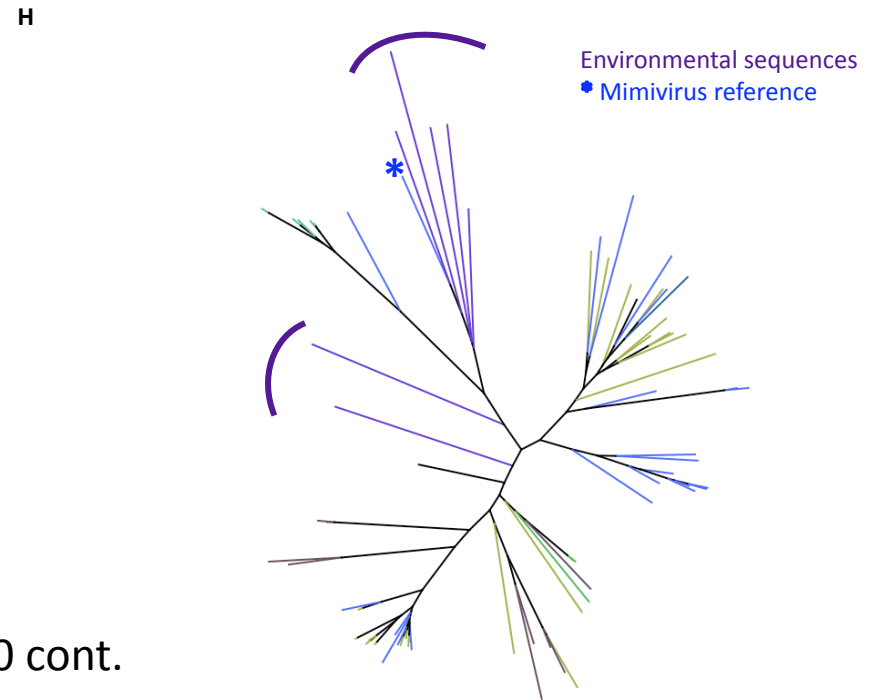

Figure S10 cont.

Figure S11

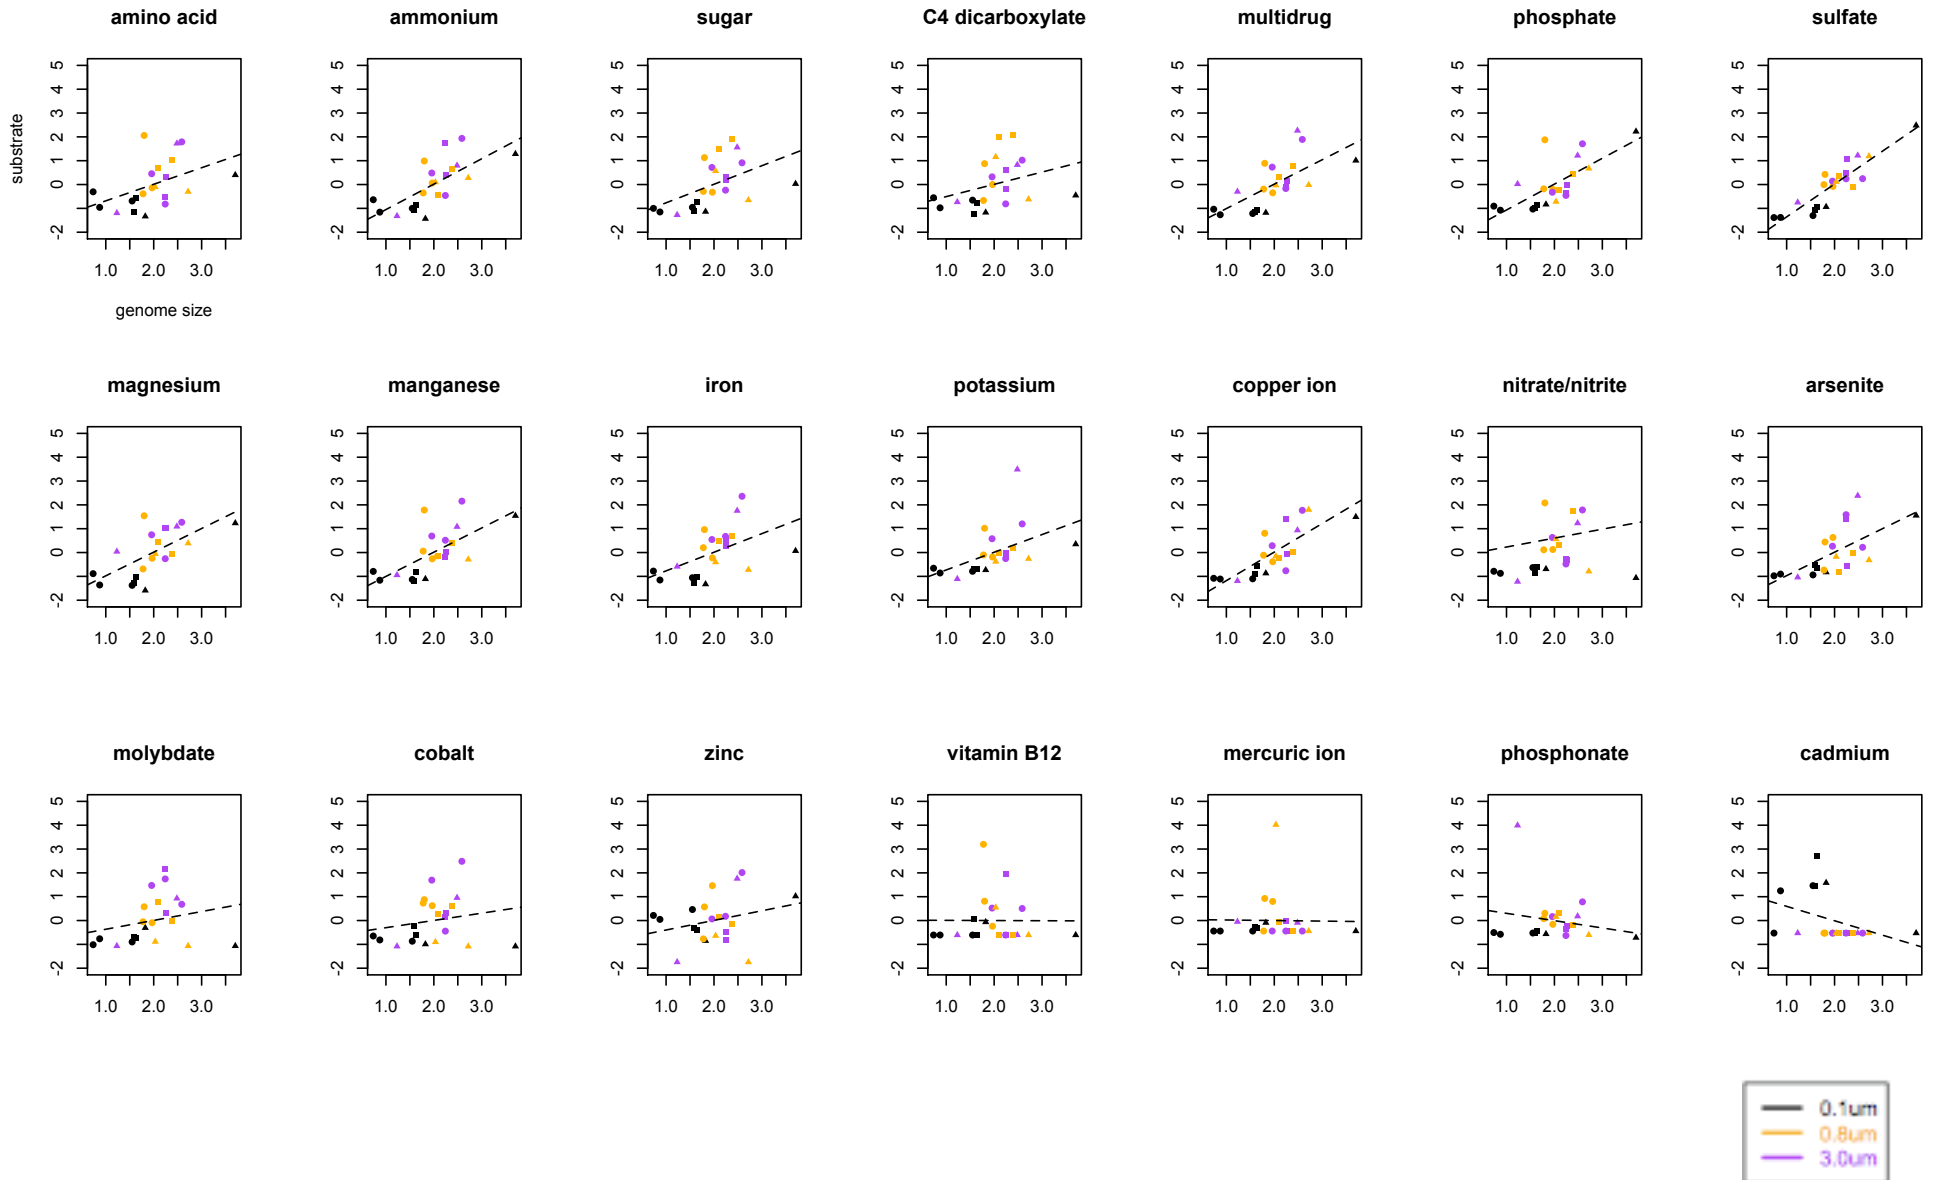

Figure S12

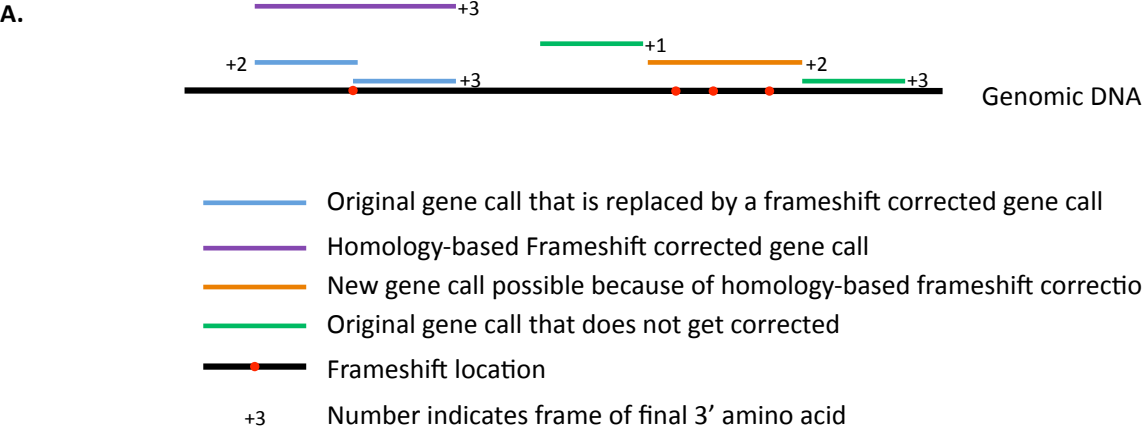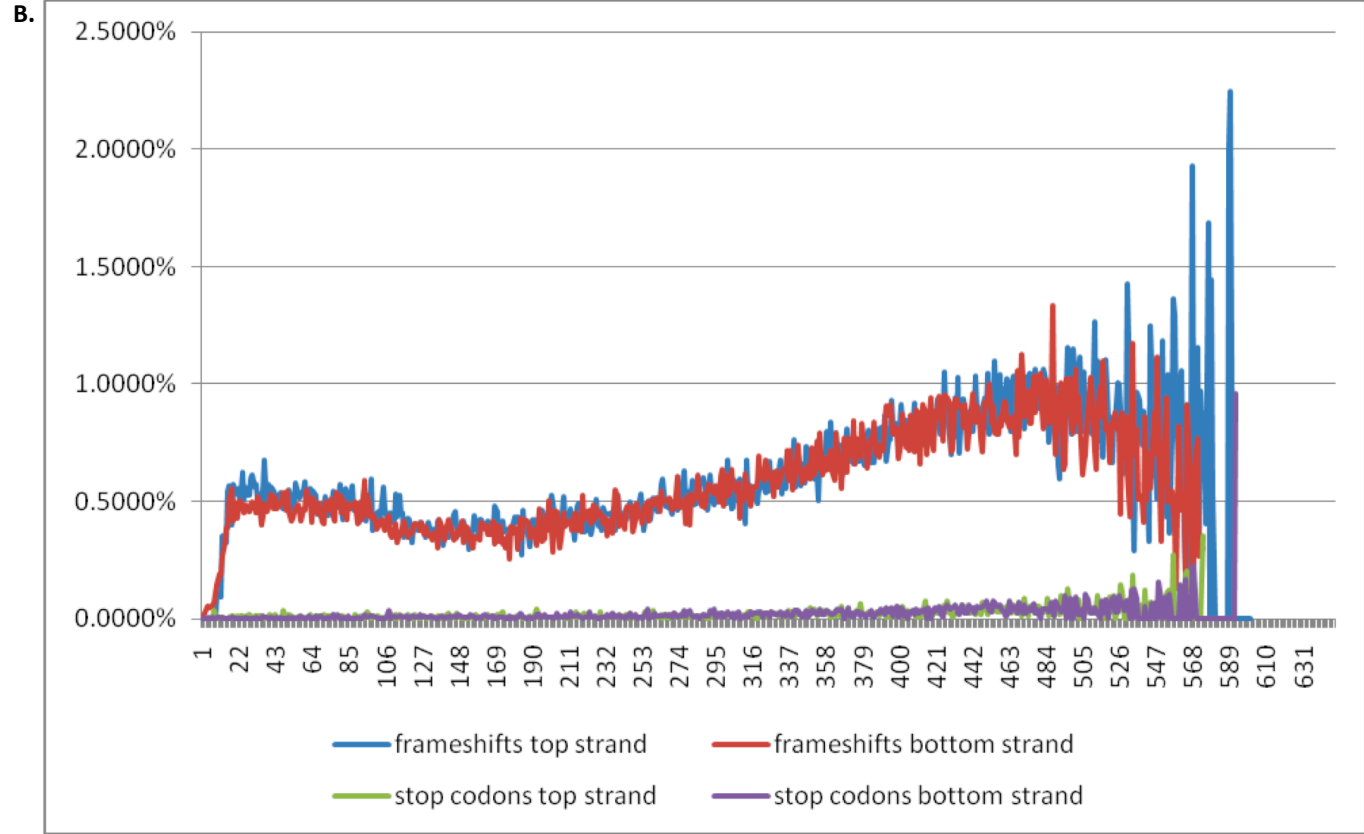

Supplement: ismej2011201x1.pdf [file ismej2011201x1.pdf]
